# Supplementary material for: METTL3 Promotes Osteo/Odontogenic Differentiation of Stem Cells by Inhibiting miR-196b-5p Maturation
Source: Hindawi journal article supplement (doi:10.1155/2023/8992284), 2023-06-07
Supplement: f1 [file 8992284.f1.pdf]

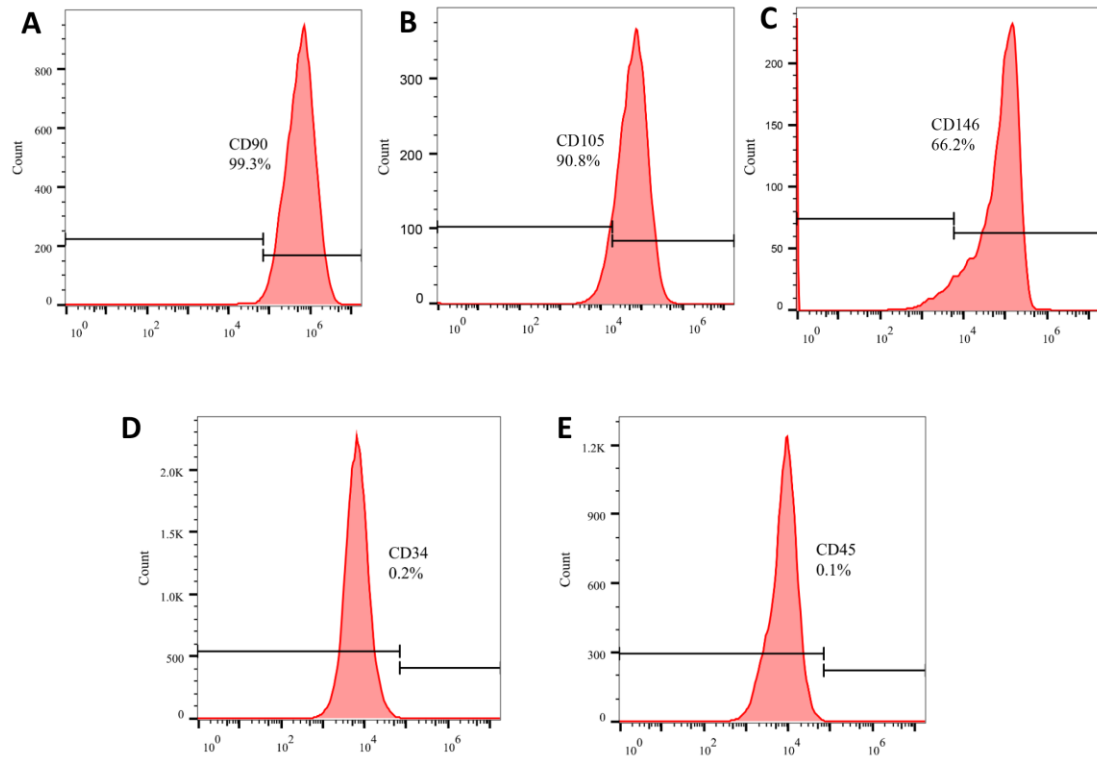

**Supplementary Fig. 1. The flow cytometric analysis of SCAPs to determine the MSCs characteristics showed that the CD90, CD105 and CD146 were positively and CD45 and CD34 were negatively expressed in SCAPs.**

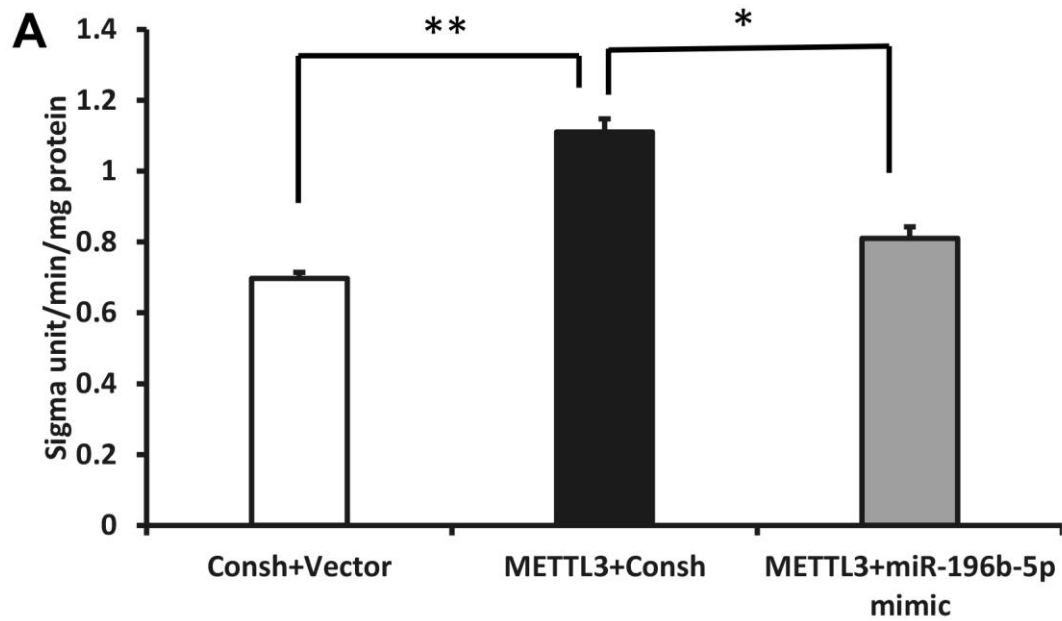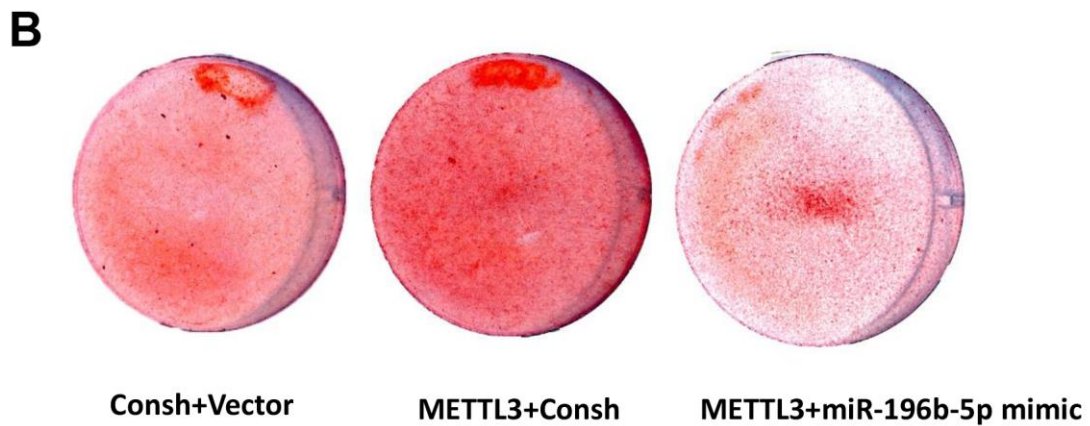

Supplementary Fig. 2. miR-196b-5p mimic attenuated osteo-/dentinogenesis differentiation promoted by METTL3 overexpression in SCAPs. (A) ALP activity assay demonstrating that SCAPs-Consh+ METTL3 group was higher than that in the SCAPs - Consh + Vector and METTL3 + miR-196b-5p mimic group. (B) Alizarin red staining analysis results demonstrating that SCAPs-Consh+ METTL3 group was higher than that in the SCAPs - Consh + Vector and METTL3 + miR-196b-5p mimic group. One-way ANOVA was used to analyze the statistical significance. All error bars signify standard deviations (n=3). \*p≤0.05, \*\*p≤0.01.
